# Supplementary material for: Facile synthesis of phosphine free ultra-small PbSe nanocrystals and their light harvesting studies in ETA solar cells
Source: Royal Society of Chemistry journal article supplement (doi:10.1039/c4dt01941e), 2014-01-01
Supplement: c4dt01941e1.pdf [file c4dt01941e1.pdf]

## Supplementary Information

### Facile Synthesis of Phosphine Free Ultra-Small PbSe Nanocrystals and Their Light Harvesting studies in ETA Solar Cell

Javeed Akhtar,<sup>\*a,b</sup> Mateusz Banski,<sup>c</sup> Mohammad Azad Malik,<sup>d</sup> Neerish Revaprasadu,<sup>e</sup> Artur Podhorodecki,<sup>c</sup> and Jan Misiewicz,<sup>c</sup>

<sup>a</sup> Department of Physics, Nanoscience & Materials Synthesis Lab, COMSATS, Institute of Information Technology, Park Road, Islamabad 44000, Pakistan

<sup>b</sup> Department of chemistry, The university of Azad Jammu and kashmir Muzaffrabad, Pakistan

<sup>c</sup> Institute of Physics, Wrocław University of Technology, Wybrzeże Wyspiańskiego 27, Wrocław, 50-370, Poland,

<sup>d</sup> School of Chemistry and Materials Science Centre, The University of Manchester Oxford Road, Manchester, M13 9PL, UK

<sup>e</sup> Department of Chemistry, University of Zululand, Private Bag X1001, KwaDlangezwa, 3880, South Africa.

#### Correspondence

Email: [javeedkt@gmail.com](mailto:javeedkt@gmail.com)

Table S1. Preparation of PbSe NCs and optical parameters

| Sample ID | Synthesis time (min.) | Average size (nm), UV-vis/(XRD) | Average size (nm)** | 1 <sup>st</sup> absorption peak (nm) | Stock shift (meV) | effective relaxation time $\langle\tau\rangle$ $\mu$ s | $\beta$ parameter |
|-----------|-----------------------|---------------------------------|---------------------|--------------------------------------|-------------------|--------------------------------------------------------|-------------------|
| C-1       | 1                     | 1.5* (1.8)                      | 1.7 $\pm$ 0.3       | 570                                  | 610               | 1.75                                                   | 0.80              |
| C-2       | 2                     | 1.6* (2.1)                      | 1.8 $\pm$ 0.5       | 600                                  | 550               | 0.95                                                   | 0.80              |
| C-5       | 5                     | 2.15* (2.2)                     | 2.12 $\pm$ 0.6      | 780                                  | 190               | 1.10                                                   | 0.89              |

\* absorption peak positions and empirical relation proposed by Quanqin Dai et al.<sup>13</sup>

( ) size calculated by using Scherrer equation, PXRD

\*\* from TEM

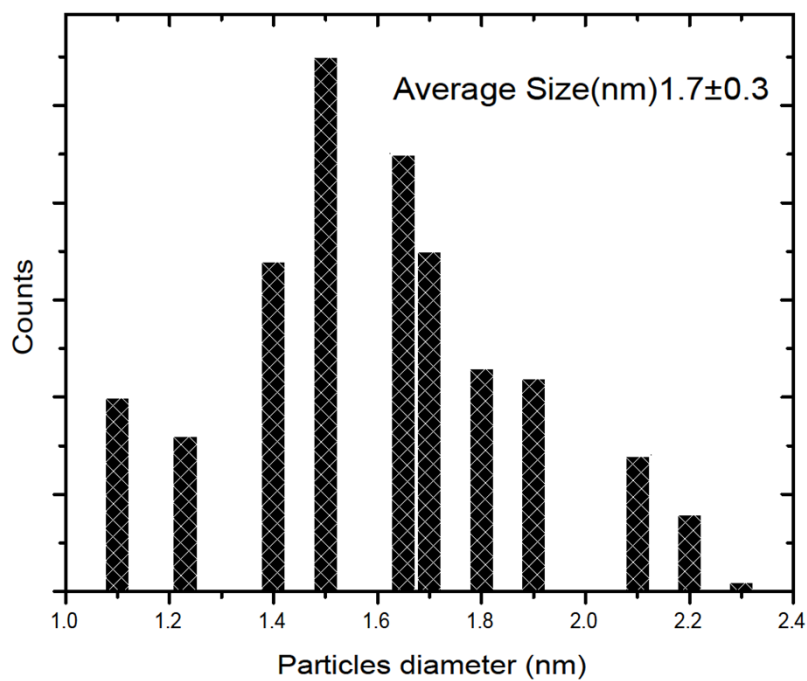

Figure S1. Size distribution profile of PbSe nanocrystals determined from HR-TEM of sample C-1

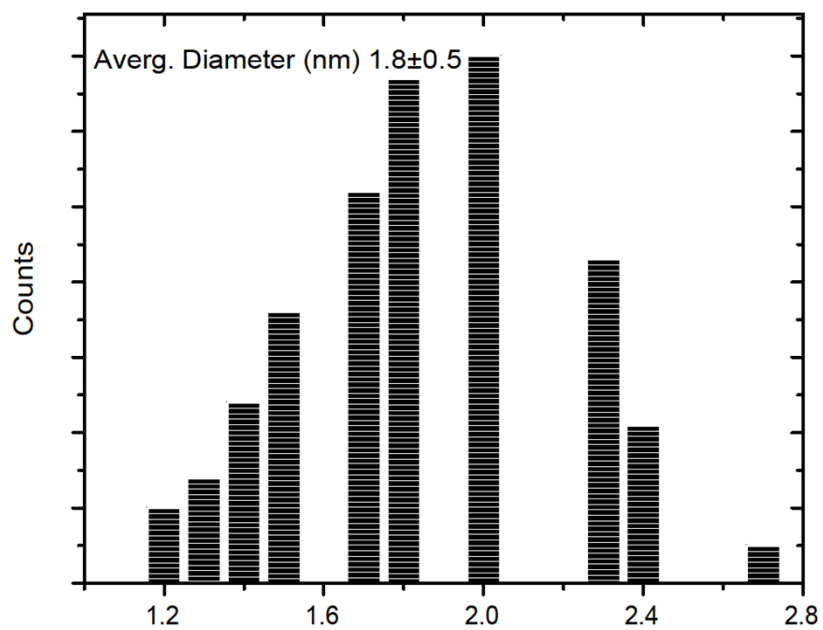

Figure S2. Size distribution profile of PbSe nanocrystals determined from HR-TEM of sample C-2

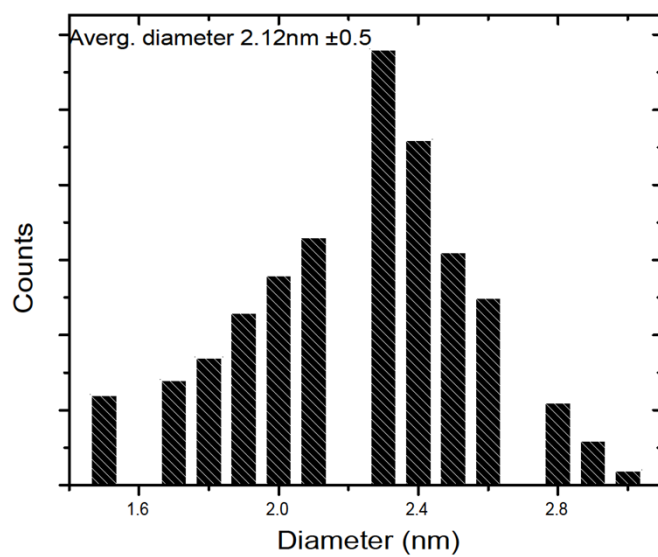

Figure S3. Size distribution profile of PbSe nanocrystals determined from HR-TEM of sample C-5

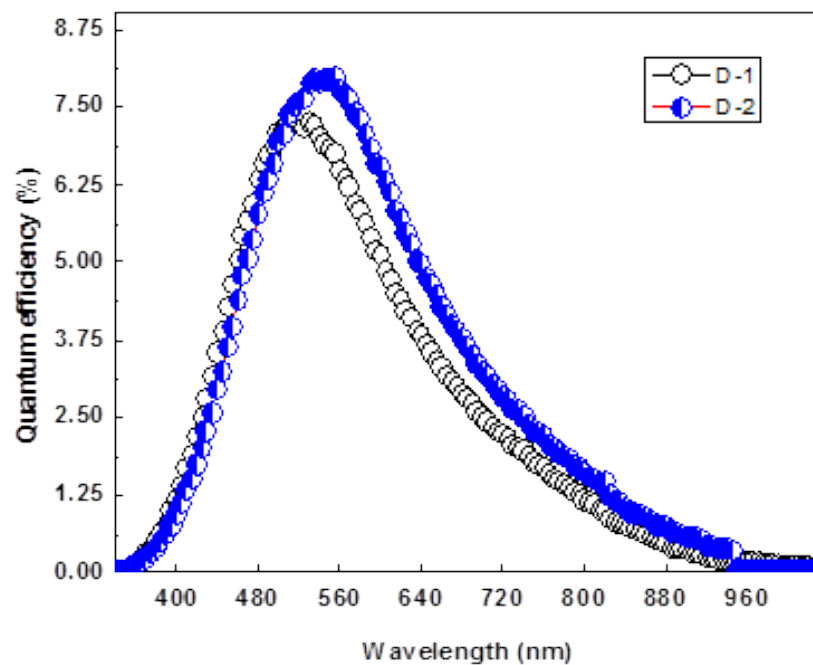

Figure S4. Incident photons to energy conversion efficiency (IPCE) spectra of D-1 and D-2 electrodes
